# Supplementary material
Source: publisher site journal article supplement (https://www.dovepress.com/article/119908)
Supplement: Supplementary file 1 [file get_supplementary_file.php]

**Supplemental Table 1: Study Design, Duration, and Inclusion Criteria of Selected Trials for LABA Monotherapy Network**

| Author, Year   | Study Name or Code | Trial Design            | Randomized | Centers/ Countries       | Inclusion criteria                                                                                                                                                                                                                                                                                  | Trial Duration | Reference                                                                                                                                                                                                                                                                                                        |
|----------------|--------------------|-------------------------|------------|--------------------------|-----------------------------------------------------------------------------------------------------------------------------------------------------------------------------------------------------------------------------------------------------------------------------------------------------|----------------|------------------------------------------------------------------------------------------------------------------------------------------------------------------------------------------------------------------------------------------------------------------------------------------------------------------|
| Ferguson, 2014 | 1222.11            | RCT, DB, MC, PC, PG     | 625        | 54 centers/ 6 countries  | post-bronchodilator forced expiratory volume in 1 second (FEV1) less than 80% predicted; FEV1/forced vital capacity (FVC) less than 70% predicted; age at least 40 years with a smoking history of more than 10 pack-years                                                                          | 48 weeks       | Ferguson et al (2014). Efficacy and safety of olodaterol once daily delivered via Respimat® in patients with GOLD 2–4 COPD: results from two replicate 48-week studies. Int J Chron Obstruct Pulmon Dis, 9, 629-45.                                                                                              |
| Ferguson, 2014 | 1222.12            | RCT, DB, MC, PC, PG     | 644        | 51 centers/ 4 countries  | post-bronchodilator forced expiratory volume in 1 second (FEV1) less than 80% predicted; FEV1/forced vital capacity (FVC) less than 70% predicted; age at least 40 years with a smoking history of more than 10 pack-years                                                                          | 48 weeks       | Same as above                                                                                                                                                                                                                                                                                                    |
| Koch, 2014     | 1222.13            | RCT, DB, DD, MC, PC, PG | 906        | 93 centers/ 20 countries | age at least 40 years; diagnosis of COPD according to GOLD; 1 post-bronchodilator forced expiratory volume in 1 second less than 80% of predicted normal; post-bronchodilator FEV1/forced vital capacity less than 70%; and current or ex-smokers with a smoking history of more than 10 pack-years | 48 weeks       | Koch et al (2014). Lung function efficacy and symptomatic benefit of olodaterol once daily delivered via Respimat® versus placebo and formoterol twice daily in patients with GOLD 2–4 COPD: results from two replicate 48-week studies. International journal of chronic obstructive pulmonary disease, 9, 697. |

|              |               |                         |      |                           |                                                                                                                                                                                                                                                                                                                                                                                                                                                                                                                                                    |          |                                                                                                                                                                                                                                                                      |
|--------------|---------------|-------------------------|------|---------------------------|----------------------------------------------------------------------------------------------------------------------------------------------------------------------------------------------------------------------------------------------------------------------------------------------------------------------------------------------------------------------------------------------------------------------------------------------------------------------------------------------------------------------------------------------------|----------|----------------------------------------------------------------------------------------------------------------------------------------------------------------------------------------------------------------------------------------------------------------------|
| Koch, 2014   | 1222.14       | RCT, DB, DD, MC, PC, PG | 937  | 98 centers/ 20 countries  | age at least 40 years; diagnosis of COPD according to GOLD; 1 post-bronchodilator forced expiratory volume in 1 second less than 80% of predicted normal; post-bronchodilator FEV1/forced vital capacity less than 70%; and current or ex-smokers with a smoking history of more than 10 pack-years                                                                                                                                                                                                                                                | 48 weeks | Same as above                                                                                                                                                                                                                                                        |
| Singh, 2014  | ACLIFORM-COPD | RCT, DB, MC, PC, PG     | 1729 | 193 centers/ 22 countries | Male and female patients $\geq 40$ years of age who were current or former cigarette smokers with a smoking history $\geq 10$ pack-years and diagnosed with moderate-to severe COPD according to GOLD 2010 criteria. Aside from salbutamol and ICS, additional permitted medications included oral sustained-release methylxanthines, oxygen therapy ( $< 15$ hours/day), and oral or parenteral corticosteroids equivalent to $\leq 10$ mg/day of prednisone or 20 mg every other day, provided treatment was stable $\geq 4$ weeks pre-screening | 24 weeks | Singh et al (2014). Efficacy and safety of acclidinium bromide/formoterol fumarate fixed-dose combinations compared with individual components and placebo in patients with COPD (ACLIFORM-COPD): a multicentre, randomised study. BMC pulmonary medicine, 14(1), 1. |
| D'Urzo, 2014 | AUGMENT COPD  | RCT, DB, MC, PC, PG     | 1692 | 222 centers/ 3 countries  | diagnosis of COPD; age $\geq 40$ years; smoking history $\geq 10$ pack-years; post FEV1 pred. $< 80\%$ ; post FEV1/FVC $< 70\%$<br>Other COPD medications, such as theophylline, ICS, oral or parenteral corticosteroids ( $\leq 10$ mg/day or 20 mg every other day of prednisone) were allowed if treatment was stable $\geq 4$ weeks prior to screening. Use of albuterol/salbutamol as rescue medication was permitted                                                                                                                         | 24 weeks | Anthony et al (2014). Efficacy and safety of fixed-dose combinations of acclidinium bromide/formoterol fumarate: the 24-week, randomized, placebo-controlled AUGMENT COPD study. Respiratory research, 15(1), 123.                                                   |
| Yao, 2014    | B2333         | RCT, DB, MC, PC, PG     | 563  | 29 centers/ 3 countries   | diagnosis of moderate-to-severe COPD by GOLD 2007 criteria; age $\geq 40$ years; smoking history $\geq 10$ pack-years; post FEV1 pred. $\geq 30\%$ & $< 80\%$ ; post FEV1/FVC $< 70\%$                                                                                                                                                                                                                                                                                                                                                             | 26 weeks | Yao et al (2014). Effect of once-daily indacaterol in a predominantly Chinese population with chronic obstructive pulmonary disease: A 26-week Asia-                                                                                                                 |

Pacific study. *Respirology*, 19(2), 231-238.

|               |                |                         |      |                           |                                                                                                                                                                                                                                                                                                                                                                                                                                                                                                                                                                                                                                                                                                                                                                                                                                 |          |                                                                                                                                                                       |
|---------------|----------------|-------------------------|------|---------------------------|---------------------------------------------------------------------------------------------------------------------------------------------------------------------------------------------------------------------------------------------------------------------------------------------------------------------------------------------------------------------------------------------------------------------------------------------------------------------------------------------------------------------------------------------------------------------------------------------------------------------------------------------------------------------------------------------------------------------------------------------------------------------------------------------------------------------------------|----------|-----------------------------------------------------------------------------------------------------------------------------------------------------------------------|
| Celli, 2014   | DB2113361      | RCT, DB, MC, PC, PG     | 1493 | 153 centers/ 14 countries | diagnosis of COPD; age $\geq$ 40 years; smoking history $\geq$ 10 pack-years; FEV1 pred. $\leq$ 70%; post FEV1/FVC $<$ 70%; mMRC dyspnea score $\geq$ 2                                                                                                                                                                                                                                                                                                                                                                                                                                                                                                                                                                                                                                                                         | 24 weeks | Celli et al (2014). Once-daily umeclidinium/vilanterol 125/25 $\mu$ g therapy in copd: a randomized, controlled study. <i>CHEST Journal</i> , 145(5), 981-991.        |
| Donohue, 2013 | DB2113373      | RCT, DB, MC, PC, PG     | 1536 | 163 centers/ 13 countries | diagnosis of COPD; age $\geq$ 40 years; smoking history $\geq$ 10 pack-years; post FEV1 pred. $\leq$ 70%; post FEV1/FVC $<$ 70%; mMRC dyspnea score $\geq$ 2                                                                                                                                                                                                                                                                                                                                                                                                                                                                                                                                                                                                                                                                    | 24 weeks | Donohue et al (2013). Efficacy and safety of once-daily umeclidinium/vilanterol 62.5/25 mcg in COPD. <i>Respiratory medicine</i> , 107(10), 1538-1546.                |
| Bateman, 2013 | SHINE, QVA2303 | RCT, DB, MC, PC, PG, AC | 2144 | 166 centers/ 19 countries | Male or female adults aged $\geq$ 40 years; moderate-to-severe stable COPD (Stage II or Stage III) according to the GOLD Guidelines 2008; current or ex-smokers who had a smoking history of at least 10 pack-years (defined as 20 cigarettes a day for 10 years, or 10 cigarettes a day for 20 years etc.); a post-bronchodilator FEV1 $\geq$ 30% and $<$ 80% of the predicted normal, and post-bronchodilator FEV1/FVC $<$ 0.7 at Visit 2 (Day 14). Post refers to 1 hour after sequential inhalation of 84 $\mu$ g (or equivalent dose) of ipratropium bromide and 400 $\mu$ g of salbutamol. Symptomatic patients, according to daily electronic diary data between Visit 2 (Day 14) and Visit 3 (Day 1), with a total score of 1 or more on at least 4 of the last 7 days prior to Visit 3 (the main study diary was used) | 26 weeks | Bateman et al (2013). Dual bronchodilation with QVA149 versus single bronchodilator therapy: the SHINE study. <i>European Respiratory Journal</i> , 42(6), 1484-1494. |

|               |                                  |                     |     |                                         |                                                                                                                                                                                                                                                                                                                                                                                                                                                                                                                                                     |           |                                                                                                                                                                                                                                                                                                                                                        |
|---------------|----------------------------------|---------------------|-----|-----------------------------------------|-----------------------------------------------------------------------------------------------------------------------------------------------------------------------------------------------------------------------------------------------------------------------------------------------------------------------------------------------------------------------------------------------------------------------------------------------------------------------------------------------------------------------------------------------------|-----------|--------------------------------------------------------------------------------------------------------------------------------------------------------------------------------------------------------------------------------------------------------------------------------------------------------------------------------------------------------|
| Maltais, 2014 | 418, GSK study number: DB2114418 | RCT, DB, MC, PC     | 308 | 42 centers/ 7 countries                 | Current or former smokers; $\geq 40$ years of age; had a smoking history of $\geq 10$ pack-years; had a clinical diagnosis of moderate-to-severe stable COPD (post-bronchodilator FEV1/forced vital capacity [FVC] $< 70\%$ and FEV1 $\geq 35\%$ and $\leq 70\%$ predicted); a score of $\geq 2$ on the Modified Medical Research Council Dyspnoea Scale at Visit 1; and a resting functional residual capacity (FRC) $\geq 120\%$ of predicted (to ensure patients were hyper-inflated, as hyperinflation is associated with exercise intolerance) | 12 weeks  | Maltais, F., Singh, S., Donald, A. C., Crater, G., Church, A., Goh, A. H., & Riley, J. H. (2014). Effects of a combination of umecclidinium/vilanterol on exercise endurance in patients with chronic obstructive pulmonary disease: two randomized, double-blind clinical trials. <i>Therapeutic advances in respiratory disease</i> , 8(6), 169-181. |
| Maltais, 2014 | 417, GSK study number: DB2114417 | RCT, DB, MC, PC     | 349 | 31 centers/ 6 countries                 | Current or former smokers; $\geq 40$ years of age; had a smoking history of $\geq 10$ pack-years; had a clinical diagnosis of moderate-to-severe stable COPD (post-bronchodilator FEV1/forced vital capacity [FVC] $< 70\%$ and FEV1 $\geq 35\%$ and $\leq 70\%$ predicted); a score of $\geq 2$ on the Modified Medical Research Council Dyspnoea Scale at Visit 1; and a resting functional residual capacity (FRC) $\geq 120\%$ of predicted (to ensure patients were hyper-inflated, as hyperinflation is associated with exercise intolerance) | 12 weeks  | Same as above                                                                                                                                                                                                                                                                                                                                          |
| Rossi, 2002   | FICOPD II                        | RCT, PC, DB, MC     | 431 | 81 centers worldwide                    | FEV1 $< 70\%$ of the predicted value and $\geq 0.75$ L, FEV1 vital capacity ratio of $< 88\%$ of that predicted in men and $< 89\%$ in women; $> 10$ pack-years smoking history                                                                                                                                                                                                                                                                                                                                                                     | 12 months | Rossi et al (2002). Comparison of the efficacy, tolerability, and safety of formoterol dry powder and oral, slow-release theophylline in the treatment of COPD. <i>CHEST Journal</i> , 121(4), 1058-1069.                                                                                                                                              |
| Dahl, 2001    | FICOPD I                         | RCT, PC, DB, DD, MC | 394 | 57 centers/ Europe, Russia, Canada, USA | FEV1 $< 70\%$ ; FEV1/FVC $< 88\%$ for men and $< 89\%$ for women; symptom criteria; excluded if used oral corticosteroids 4 wks prior                                                                                                                                                                                                                                                                                                                                                                                                               | 12 weeks  | Dahl et al (2001). Inhaled formoterol dry powder versus ipratropium bromide in chronic                                                                                                                                                                                                                                                                 |

|                 |                  |                     |      |                                                                                  |                                                                                                                                                               |          |                                                                                                                                                                                                                                                                  |
|-----------------|------------------|---------------------|------|----------------------------------------------------------------------------------|---------------------------------------------------------------------------------------------------------------------------------------------------------------|----------|------------------------------------------------------------------------------------------------------------------------------------------------------------------------------------------------------------------------------------------------------------------|
| Gross, 2008     | N/A              | RCT, PC, DB, DD, MC | 228  | 38 centers/ USA                                                                  | post-broncho FEV1 30%-70%; FEV1/FVC<0.70; ≥ 10 pack-years; excluded if exacerbation in 1 month prior                                                          | 12 weeks | obstructive pulmonary disease. American journal of respiratory and critical care medicine, 164(5), 778-784.<br>Gross et al (2008). Efficacy and safety of formoterol fumarate delivered by nebulization to COPD patients. Respiratory medicine, 102(2), 189-197. |
| Kornmann, 2011  | INLIGHT-2, B2336 | RCT, PC, DB, MC, DD | 1002 | # centers NR/ Canada, Colombia, Europe and Russia, Slovakia, India, Peru, Taiwan | FEV1 ≥ 30% and <80%; FEV1/FVC<70%; reversible and non-reversible patients included; ≥ 20 pack-years smoking history; excluded if hospitalization 6 wks prior  | 26 weeks | Kornmann et al (2011). Once-daily indacaterol versus twice-daily salmeterol for COPD: a placebo-controlled comparison. European Respiratory Journal, 37(2), 273-279.                                                                                             |
| Korn, 2011      | INSIST, B2349    | RCT, DB, MC, DD     | 1123 | 142 centers across 8 countries                                                   | Post-bronchodilator FEV1 ≥30% and <80%, FEV1/FVC <70%; ≥ 10 pack-years smoking history; Excluded if exacerbation in 6 weeks prior                             | 12 weeks | Korn et al (2011). Indacaterol once-daily provides superior efficacy to salmeterol twice-daily in COPD: a 12-week study. Respiratory medicine, 105(5), 719-726.                                                                                                  |
| Kinoshita, 2012 | B1302            | RCT, PC, DB, MC     | 347  | 73 centers; Japan, Taiwan, Korea, India, Hong Kong, and Singapore                | Post broncho FEV1<80% and ≥30% of predicted normal value, Post broncho FEV1/FVC<70%, ≥ 20 pack-years smoking history; excluded if exacerbation in 6 wks prior | 12 weeks | Kinoshita et al (2012). Efficacy and safety of indacaterol 150 and 300 µg in chronic obstructive pulmonary disease patients from six Asian areas including Japan: A 12-week, placebo-controlled study. Respirology, 17(2), 379-389.                              |

|                              |                 |                                                                    |      |                                                                            |                                                                                                                                                                                                                |          |                                                                                                                                                                                                                                                                                                                                                                                                                                                                                                                               |
|------------------------------|-----------------|--------------------------------------------------------------------|------|----------------------------------------------------------------------------|----------------------------------------------------------------------------------------------------------------------------------------------------------------------------------------------------------------|----------|-------------------------------------------------------------------------------------------------------------------------------------------------------------------------------------------------------------------------------------------------------------------------------------------------------------------------------------------------------------------------------------------------------------------------------------------------------------------------------------------------------------------------------|
| Donohue, 2010                | INHANCE, B2335S | RCT, PC, DB (except for tiotropium arm), MC, DD; Adaptive seamless | 1683 | # centers NR/ Argentina, Canada, Europe, India, Italy, Korea, Taiwan, USA  | FEV1 $\geq$ 30% and $<$ 80%; FEV1/FVC $<$ 70%; reversible and non-reversible patients included; $\geq$ 20 pack-years smoking history; excluded if hospitalization 6 wks prior                                  | 26 weeks | Donohue et al (2010). Once-daily bronchodilators for chronic obstructive pulmonary disease: indacaterol versus tiotropium. American journal of respiratory and critical care medicine, 182(2), 155-162.                                                                                                                                                                                                                                                                                                                       |
| Dahl, 2010                   | INVOLVE, B2334  | RCT, PC, DB, MC, DD                                                | 1304 | # centers NR/ 25 countries in S. America, Europe, Russia, Africa, and Asia | FEV1 $\geq$ 30% and $<$ 80%; FEV1/FVC $<$ 70%; reversible and non-reversible patients included; $\geq$ 20 pack-years smoking history; excluded if hospitalization 6 wks prior to trial or during run-in period | 52 weeks | Dahl et al (2010). Efficacy of a new once-daily long-acting inhaled $\beta$ 2-agonist indacaterol versus twice-daily formoterol in COPD. Thorax, 65(6), 473-479.                                                                                                                                                                                                                                                                                                                                                              |
| Gotfried, 2012; Kerwin, 2011 | B2354           | RCT, PC, DB, MC                                                    | 323  | # centers NR/USA                                                           | FEV1 $\geq$ 30% and $<$ 80%; FEV1/FVC $<$ 70%; $\geq$ 10 pack-year smoking history; Excluded if exacerbation in 6 wks prior                                                                                    | 12 weeks | Gotfried et al (2012). Efficacy of indacaterol 75 $\mu$ g once-daily on dyspnea and health status: results of two double-blind, placebo-controlled 12-week studies. COPD: Journal of Chronic Obstructive Pulmonary Disease, 9(6), 629-636.<br><br>Kerwin et al (2011). Efficacy and tolerability of indacaterol 75 $\mu$ g once daily in patients aged $\geq$ 40 years with chronic obstructive pulmonary disease: results from 2 double-blind, placebo-controlled 12-week studies. Clinical therapeutics, 33(12), 1974-1984. |

|                                 |                     |                              |      |                                                                         |                                                                                                                                                                                    |          |                                                                                                                                                                                                                                                                                                                           |
|---------------------------------|---------------------|------------------------------|------|-------------------------------------------------------------------------|------------------------------------------------------------------------------------------------------------------------------------------------------------------------------------|----------|---------------------------------------------------------------------------------------------------------------------------------------------------------------------------------------------------------------------------------------------------------------------------------------------------------------------------|
| Gotfried, 2012;<br>Kerwin, 2011 | B2355               | RCT,<br>PC, DB,<br>MC        | 318  | # centers NR/<br>USA                                                    | FEV1 $\geq$ 30% and $<$ 80%;<br>FEV1/FVC $<$ 70%; $\geq$ 10 pack-year<br>smoking history; Excluded if<br>exacerbation in 6 wks prior                                               | 12 weeks | Same as above                                                                                                                                                                                                                                                                                                             |
| Feldman, 2010                   | INLIGHT 1,<br>B2346 | RCT,<br>PC, DB,<br>MC,<br>DD | 416  | 103 centers/<br>USA,<br>Australia/ New<br>Zealand,<br>Belgium           | FEV1 $\geq$ 30% and $<$ 80%;<br>FEV1/FVC $<$ 70%; reversible and non-<br>reversible patients included; excluded if<br>hospitalization 6 wks prior                                  | 12 weeks | Feldman et al (2010).<br>Efficacy and safety of<br>indacaterol 150 $\mu$ g once-<br>daily in COPD: a double-<br>blind, randomised, 12-<br>week study. BMC<br>pulmonary medicine,<br>10(1), 1.                                                                                                                             |
| Stockley, 2006                  | SMS40026            | RCT,<br>PC, DB,<br>MC        | 634  | # centers NR/19<br>European<br>countries                                | FEV1 $<$ 70%; $\leq$ 10% reversibility FEV1<br>predicted; included if $\geq$ 2 exacerbations in<br>previous year                                                                   | 52 weeks | Stockley et al (2006).<br>Addition of salmeterol to<br>existing treatment in<br>patients with COPD: a 12<br>month study. Thorax,<br>61(2), 122-128.                                                                                                                                                                       |
| Chapman, 2002                   | N/A                 | RCT,<br>PC, DB,<br>MC        | 408  | 52 centers/<br>Canada, UK,<br>Netherlands,<br>Sweden, Russia<br>Denmark | FEV1 $\leq$ 85%; FEV1/FVC $\leq$ 70%;<br>symptoms criteria; 5-15% reversibility<br>FEV1 predicted; $\geq$ 10 pack-year smoking<br>history; excluded if exacerbation 4 wks<br>prior | 24 weeks | Chapman et al (2002). The<br>addition of salmeterol 50<br>microg bid to<br>anticholinergic treatment in<br>patients with COPD: a<br>randomized, placebo<br>controlled trial. Chronic<br>obstructive pulmonary<br>disease. Canadian<br>respiratory journal: journal<br>of the Canadian Thoracic<br>Society, 9(3), 178-185. |
| Van Rутten, 1999                | N/A                 | RCT,<br>PC, DB,<br>MC,<br>DD | 97   | 3 centers/<br>Netherlands                                               | FEV1 40-65%; FEV1/FVC $\leq$ 60% (post<br>salbutamol); symptom criteria; $\geq$ 10<br>pack-years smoking history                                                                   | 12 weeks | Van-Rутten et al (1999).<br>An empirical comparison<br>of the St George's<br>Respiratory Questionnaire<br>(SGRQ) and the Chronic<br>Respiratory Disease<br>Questionnaire (CRQ) in a<br>clinical trial setting.<br>Thorax, 54(11), 995-1003.                                                                               |
| Calverley,                      | TORCH               | RCT,                         | 3087 | 444 centers/ 42                                                         | FEV1 $<$ 60%; FEV1/FVC $<$ 70%; $<$ 10%                                                                                                                                            | 3 years  | Calverley et al (2007).                                                                                                                                                                                                                                                                                                   |

|                         |          |                              |      |                              |                                                                                                                                                                                                                 |          |                                                                                                                                                                                                                                                            |
|-------------------------|----------|------------------------------|------|------------------------------|-----------------------------------------------------------------------------------------------------------------------------------------------------------------------------------------------------------------|----------|------------------------------------------------------------------------------------------------------------------------------------------------------------------------------------------------------------------------------------------------------------|
| 2007;<br>Jones,<br>2011 |          | PC, DB,<br>MC                |      | countries                    | increase FEV1 predicted post-broncho.                                                                                                                                                                           |          | Salmeterol and fluticasone propionate and survival in chronic obstructive pulmonary disease. <i>New England Journal of Medicine</i> , 356(8), 775-789.                                                                                                     |
|                         |          |                              |      |                              |                                                                                                                                                                                                                 |          | Jones et al (2011). Health status in the TORCH study of COPD: treatment efficacy and other determinants of change. <i>Respiratory research</i> , 12(1), 71.                                                                                                |
| Celli,<br>2003          | N/A      | RCT,<br>PC, DB,<br>MC,<br>DD | 825  | 189 centers/ 15<br>countries | FEV1 20-70%; FEV1/FVC<65%; <15% reversibility FEV1; symptom criteria; $\geq$ 15 pack-years smoking history; excluded if exacerbation 6 wks prior                                                                | 12 weeks | Celli et al (2003). Symptoms are an important outcome in chronic obstructive pulmonary disease clinical trials: results of a 3-month comparative study using the Breathlessness, Cough and Sputum Scale (BCSS). <i>Respiratory medicine</i> , 97, S35-S43. |
| Hanania,<br>2003        | SFCA3007 | RCT,<br>PC, DB,<br>MC        | 540  | 76 centers/<br>USA           | FEV1 >40% and <65%; FEV1/FVC<70%; symptoms criteria; $\geq$ 20 pack-years smoking history; excluded if oral corticosteroids 6 wks prior                                                                         | 24 weeks | Hanania et al (2003). The efficacy and safety of fluticasone propionate (250 $\mu$ g)/salmeterol (50 $\mu$ g) combined in the Diskus inhaler for the treatment of COPD. <i>Chest</i> , 124(3), 834-843.                                                    |
| Calverley,<br>2003      | TRISTAN  | RCT,<br>PC, DB,<br>MC        | 1091 | 196 centers/ 25<br>countries | FEV1 25-70%; FEV1/FVC<70%; increase $\geq$ 10% FEV1 post-broncho.; $\geq$ 10 pack-years smoking history; included if $\geq$ 1 exacerbation previous year and $\geq$ 1 exacerbation per year in previous 3 years | 52 weeks | Calverley et al (2003). Combined salmeterol and fluticasone in the treatment of chronic obstructive pulmonary disease: a randomised controlled trial. <i>The Lancet</i> ,                                                                                  |



361(9356), 449-456.

|                |          |                     |      |                            |                                                                                                                              |          |                                                                                                                                                                                                                                                                   |
|----------------|----------|---------------------|------|----------------------------|------------------------------------------------------------------------------------------------------------------------------|----------|-------------------------------------------------------------------------------------------------------------------------------------------------------------------------------------------------------------------------------------------------------------------|
| Mahler, 2002   | SFCA3006 | RCT, PC, DB, MC, DD | 506  | 65 centers                 | FEV1 <65% but >70L. FEV1/FVC ≤70%; ≥ 20 pack-year smoking history; excluded if moderate or severe exacerbation during run-in | 24 weeks | Mahler et al (2002). Effectiveness of fluticasone propionate and salmeterol combination delivered via the Diskus device in the treatment of chronic obstructive pulmonary disease. American journal of respiratory and critical care medicine, 166(8), 1084-1091. |
| Brusasco, 2003 | N/A      | RCT, PC, DB, MC, DD | 1207 | # centers NR/ 18 countries | FEV1 ≤ 65%;FEV1/FVC ≤ 70%                                                                                                    | 24 weeks | Brusasco et al (2003). Health outcomes following treatment for 6 months with once daily tiotropium compared with twice daily salmeterol in patients with COPD. Thorax, 58(5), 399-404.                                                                            |
| Donohue, 2002  | N/A      | RCT, PC, DB, MC, DD | 623  | 39 centers/ 12 countries   | FEV1 ≤ 60%;FEV1/FVC ≤ 70%; >10 pack-years smoking history                                                                    | 36 weeks | Donohue et al (2002). A 6-month, placebo-controlled study comparing lung function and health status changes in COPD patients treated with tiotropium or salmeterol. Chest, 122(1), 47-55.                                                                         |

**Abbreviations:** RCT - randomized clinical trial; DB - double-blind; DD - double-dummy; MC - multi-center; PC - placebo-controlled; PG - parallel-group; AC - active-comparator; BID - twice daily; GSK – GlaxoSmithKline; OD - once daily; LAMA - long-acting muscarinic antagonists; LABA - long-acting beta-2 adrenergic agonist; mMRC - Modified Medical Research Council; NA - not applicable.

**Supplemental Table 2: Selected Trials' Patient Characteristics**

| <b>Trial ID</b> | <b>Author, year (Study ID)</b>          | <b>% ICS use per study</b> | <b>% male per study</b> | <b>Age (mean, years) per study</b> | <b>Current smokers (%) per study</b> | <b>% severe or very severe COPD per study</b> |
|-----------------|-----------------------------------------|----------------------------|-------------------------|------------------------------------|--------------------------------------|-----------------------------------------------|
| 1               | Ferguson, 2014 (1222.11)                | 43%                        | 73%                     | 64.93                              | 39%                                  | 54%                                           |
| 2               | Ferguson, 2014 (1222.12)                | 39%                        | 71%                     | 64.63                              | 44%                                  | 52%                                           |
| 3               | Koch, 2014 (1222.13)                    | 44%                        | 78%                     | 63.78                              | 35%                                  | 46%                                           |
| 4               | Koch, 2014 (1222.14)                    | 52%                        | 81%                     | 64.10                              | 33%                                  | 47%                                           |
| 5               | Singh, 2014                             | 20%                        | 68%                     | 63.20                              | 47%                                  | 40%                                           |
| 6               | D'Urzo, 2014                            | NR                         | 53%                     | 63.94                              | 52%                                  | 42%                                           |
| 7               | Yao, 2014 (B2333)                       | 35%                        | 94%                     | 65.40                              | 22%                                  | 53%                                           |
| 8               | Celli, 2014                             | 47%                        | 65%                     | 62.93                              | 52%                                  | 53%                                           |
| 9               | Donohue, 2013                           | 51%                        | 71%                     | 63.07                              | 50%                                  | 54%                                           |
| 15              | Bateman, 2013 (QVA2303)                 | 57%                        | 75%                     | 63.91                              | 40%                                  | 36%                                           |
| 17              | Maltais, 2014 (418)                     | 39%                        | 55%                     | 62.60                              | 61%                                  | 47%                                           |
| 18              | Maltais, 2014 (417)                     | 28%                        | 56%                     | 61.60                              | 63%                                  | 47%                                           |
| 19              | Rossi, 2002                             | NR                         | 83%                     | 63.00                              | NR                                   | NR                                            |
| 20              | Dahl, 2001                              | 51%                        | 77%                     | 63.49                              | 48%                                  | 66%                                           |
| 21              | Gross, 2008                             | 21%                        | 56%                     | 63.50                              | 54%                                  | 67%                                           |
| 22              | Kornmann, 2010 (B2336)                  | 44%                        | 75%                     | 63.33                              | 46%                                  | 43%                                           |
| 23              | Korn 2011 (B2349)                       | 46%                        | 71%                     | 62.93                              | 44%                                  | 46%                                           |
| 24              | Kinoshita 2012 (B1302)                  | 24%                        | 97%                     | 66.67                              | 32%                                  | 40%                                           |
| 25              | Donohue, 2010 (B2335S)                  | 38%                        | 63%                     | 63.50                              | 45%                                  | 40%                                           |
| 26              | Dahl, 2010 (B2334)                      | 53%                        | 81%                     | 63.67                              | 41%                                  | 44%                                           |
| 27              | Gotfried 2012, Kerwin 2011 (B2354)      | 45%                        | 55%                     | 64.00                              | 44%                                  | 43%                                           |
| 28              | Gotfried 2012, Kerwin 2011 (B2355)      | 38%                        | 54%                     | 61.50                              | 59%                                  | 38%                                           |
| 29              | Feldman, 2010 (B2346)                   | 31%                        | 52%                     | 63.00                              | 52%                                  | 39%                                           |
| 30              | Stockley, 2006                          | 57%                        | 76%                     | 62.00                              | 46%                                  | 61%                                           |
| 31              | Chapman, 2002                           | 65%                        | 64%                     | NR                                 | 43%                                  | NR                                            |
| 32              | Van Rutten, 1999                        | 78%                        | 87%                     | 63.97                              | NR                                   | 75%                                           |
| 33              | Calverley, 2007 and Jones, 2011 (TORCH) | 0%                         | 76%                     | 65.00                              | 43%                                  | 69%                                           |
| 34              | Celli, 2003                             | NR                         | 77%                     | 64.33                              | NR                                   | 72%                                           |
| 35              | Hanania, 2003                           | 0%                         | 62%                     | 64.01                              | 50%                                  | 76%                                           |
| 36              | Calverley, 2003                         | 0%                         | 73%                     | 63.00                              | 50%                                  | 65%                                           |
| 37              | Mahler, 2002                            | 0%                         | 67%                     | 63.35                              | 49%                                  | NR                                            |
| 38              | Brusasco, 2003                          | NR                         | 76%                     | 64.33                              | NR                                   | 83%                                           |
| 39              | Donohue, 2002                           | 67%                        | 75%                     | 65.32                              | NR                                   | 60%                                           |

**Abbreviations:** ICS- inhaled corticosteroid; COPD- Chronic Obstructive Pulmonary Disease; LABA- long-acting beta-2 adrenergic agonist; NR- not reported; ID- identification.
